# Supplementary material for: Calcium channel Orai1 promotes lymphocyte IL-17 expression and progressive kidney injury
Source: JCI journal article supplement (doi:10.1172/jci126108), 2019-08-15
Supplement: sd1 [file 1]

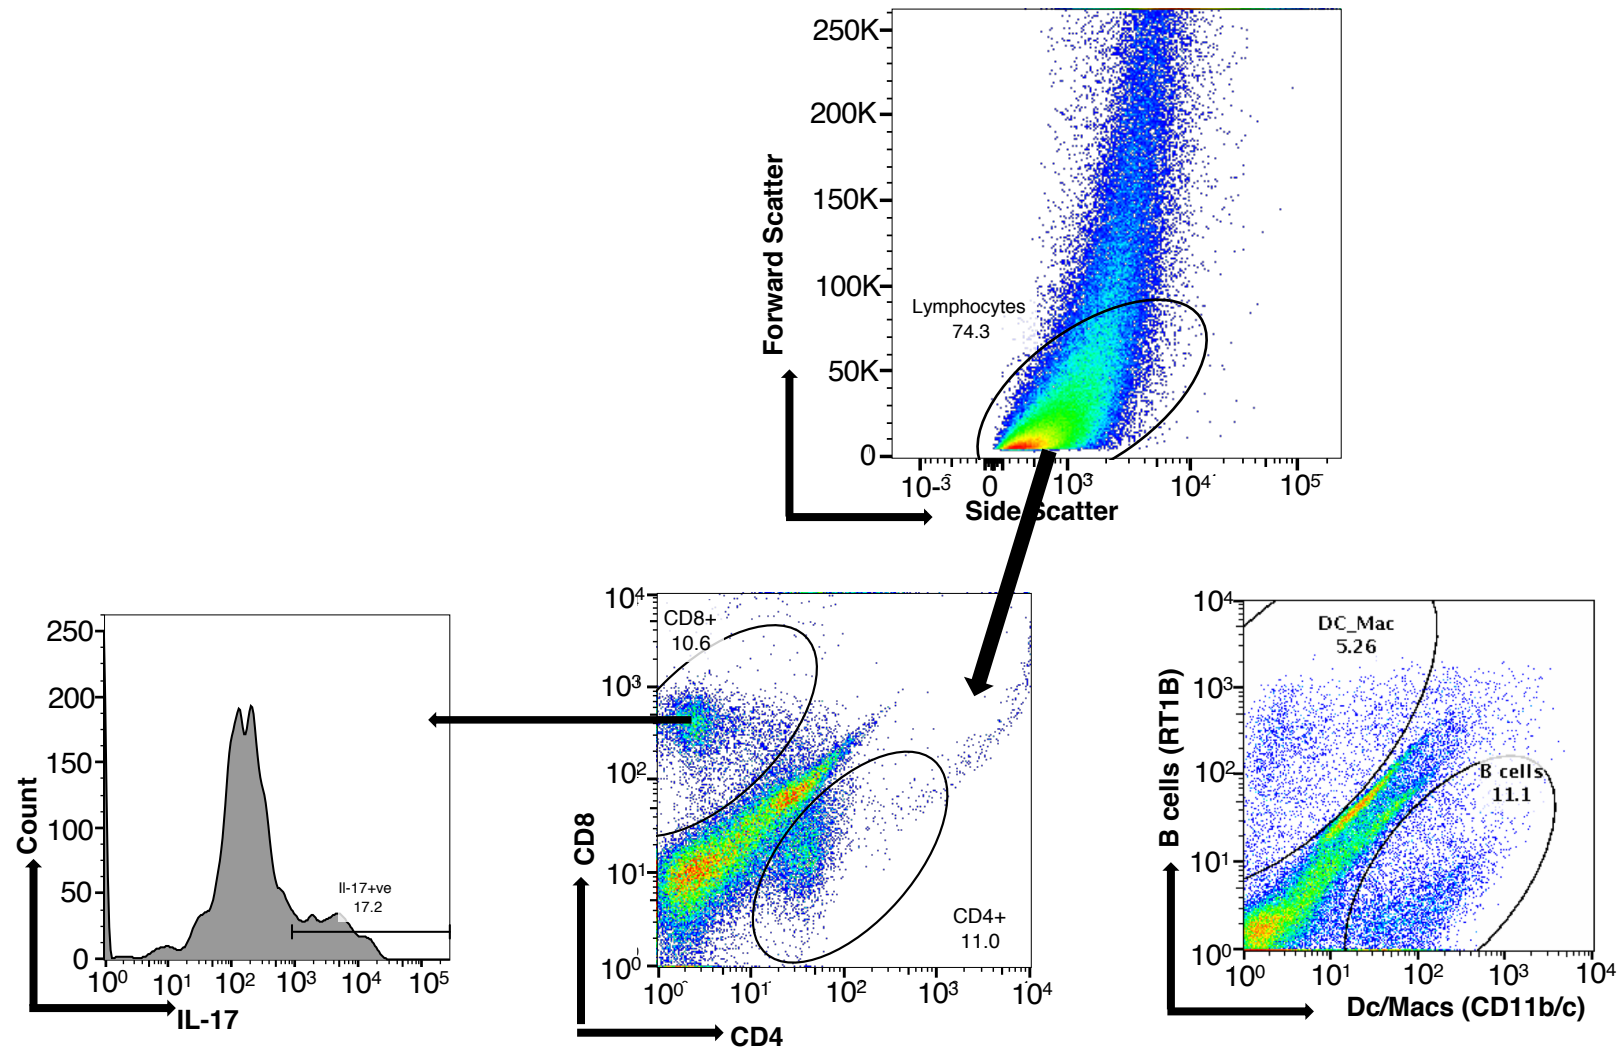

**Supplementary figure 1: (A) Gating Strategies for phenotypic analysis of infiltrating immune cells in the kidney.**

Lymphocyte gating is based on the forward scatter vs side scatter, which is further gated on CD4+ or CD8+ T cell or B-cells or DC/Macrophages. These populations were analyzed further based on IL-17 or Orai-1 expression as described in text.

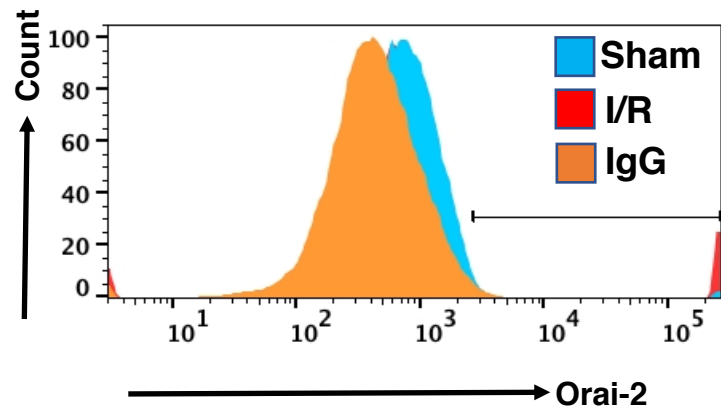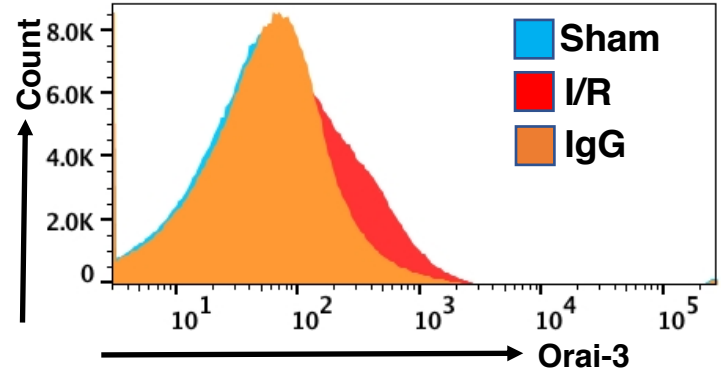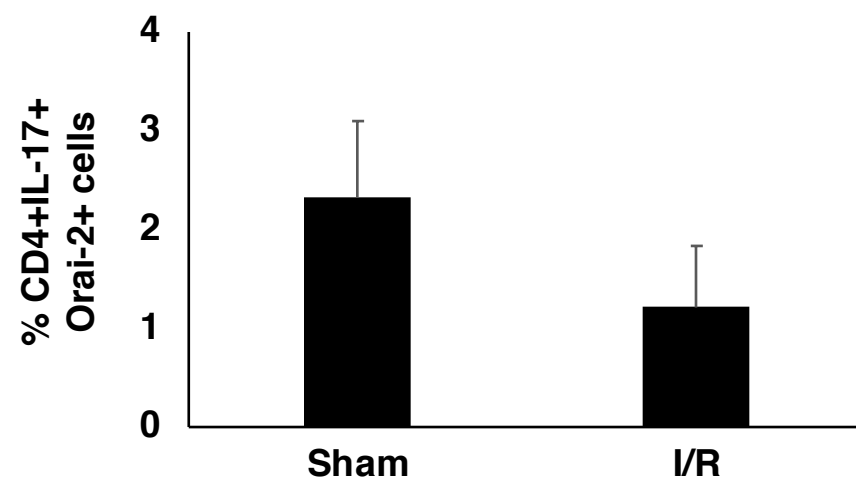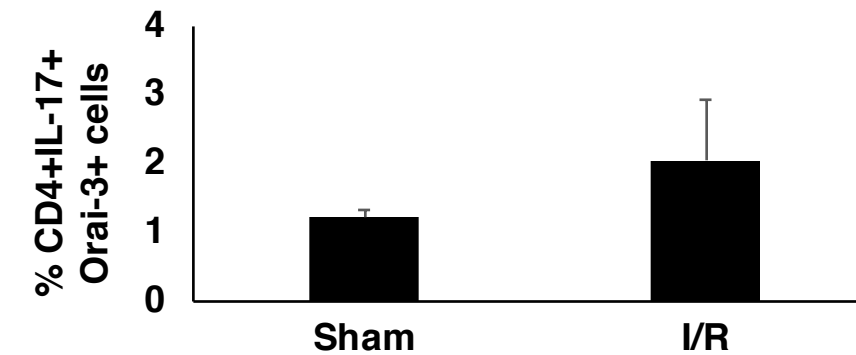

**Supplemental Figure 2. Orai2 and Orai3 expression in kidney lymphocytes following renal I/R injury.** A) Representative histogram of Orai2+ lymphocytes (left panel) and percent CD4+/Orai2+ cells in kidney 2 days following sham or I/R injury. B) Representative histogram of Orai3+ lymphocytes (left panel) and percent CD4+/Orai3+ cells in kidney 2 days following sham or I/R injury. Data are mean  $\pm$  SE from a minimum of 3 independent rats per group; no statistical differences were observed between sham and I/R.

Control for Figure 2c

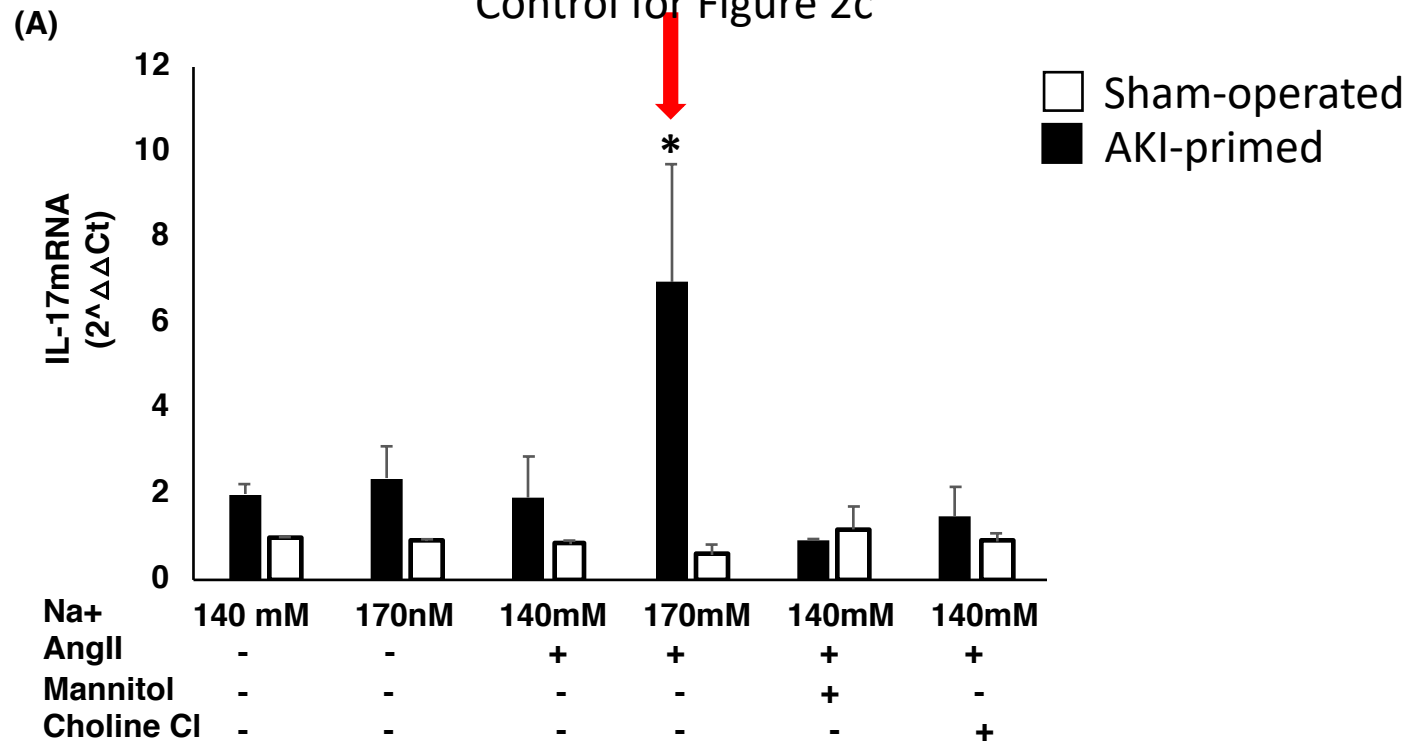

(B)

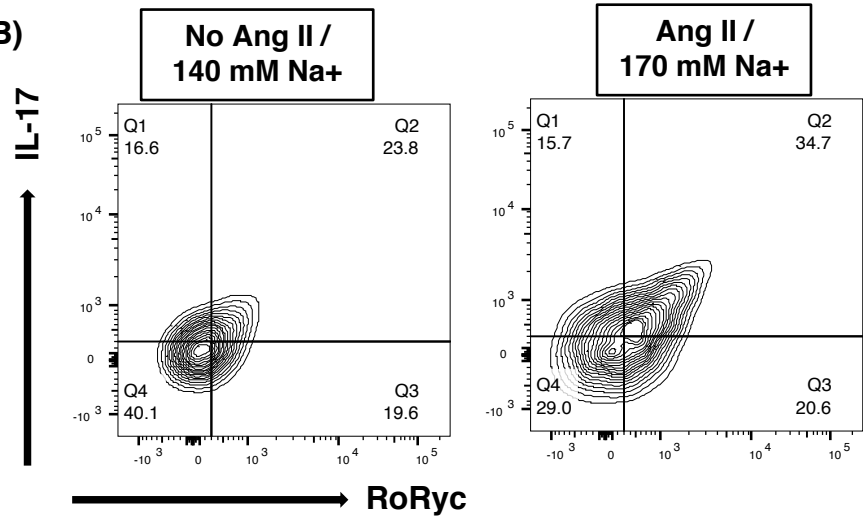

(C)

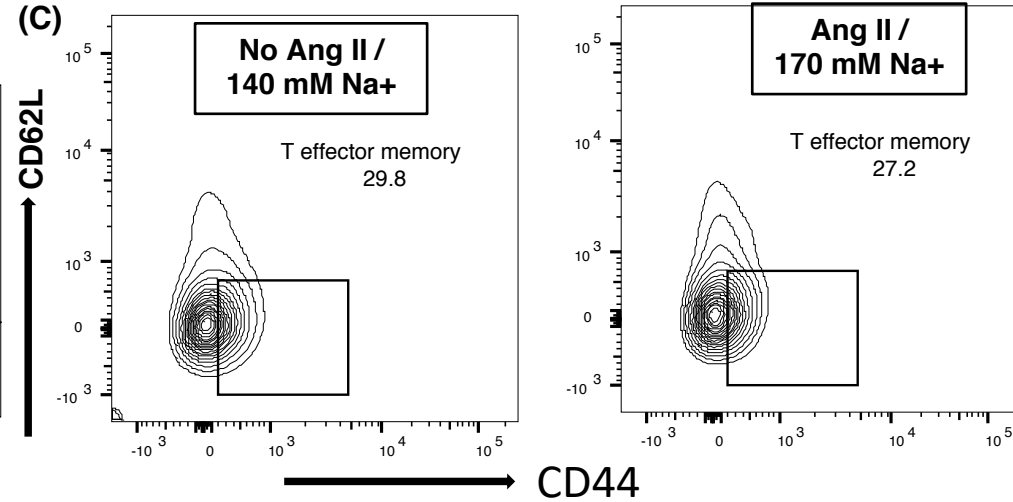

**Supplemental Figure 3. Renal injury primes IL17 mRNA response in kidney derived CD4+ cells.** Renal CD4 cells were isolated from kidney 7 days following sham (open bar) or I/R surgery (black bar). Cells were incubated for 12-14 hours in media containing either 140 or 170 mM Na<sup>+</sup> with or without Ang II (10<sup>-7</sup>M) as shown. To control for supplementation of NaCl to the media, some samples were stimulated with equimolar mannitol (60 mM) or choline chloride (30 mM) as shown. IL17 mRNA is expressed as 2<sup>-ΔΔCT</sup> and is mean ± SE from a minimum of 3 independent rats per group; \* indicates P < 0.05 vs control (i.e., 140 mM Na<sup>+</sup>, no added Ang II), by one-ANOVA and Tukey's post-hoc test. Note the response of AKI primed cells with Ang II and added Na<sup>+</sup> indicated by the arrow, which is used as the control in Figure 2A.

(A)

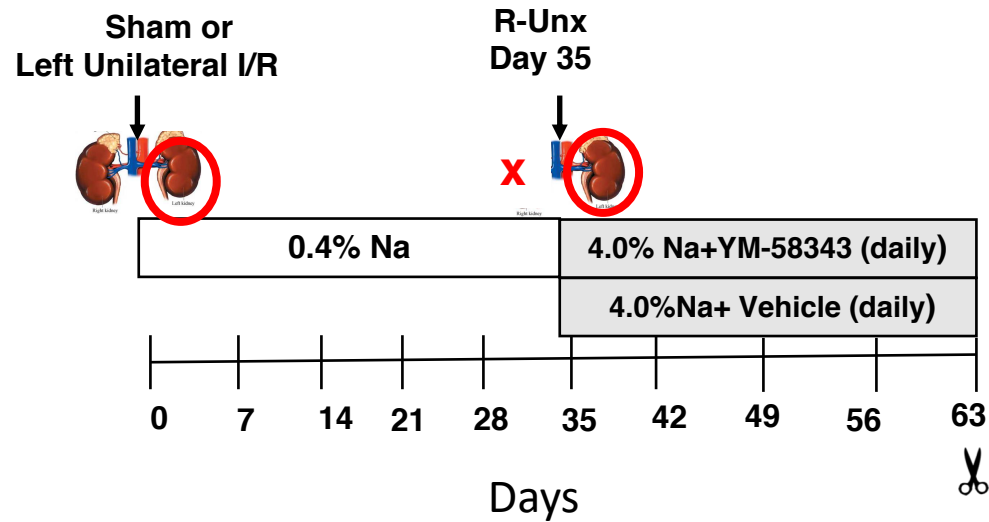

(B)

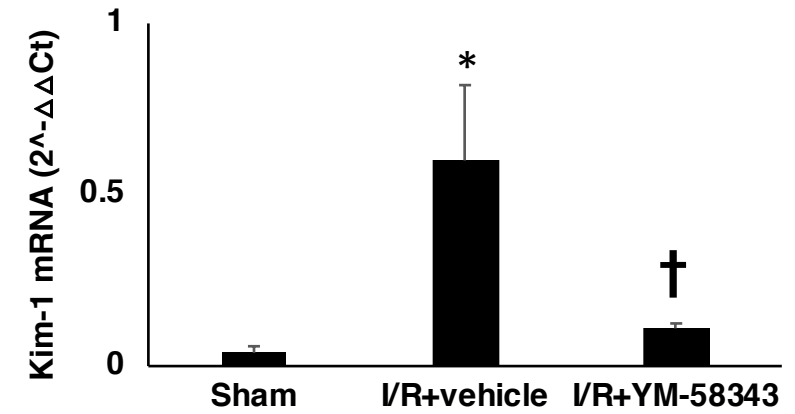

**Supplemental Figure 4.** A) Schematic outline of timeline to investigate the role of SOCE in progression of CKD following acute I/R injury. B) Renal Kim-1 expression measured in sham, I/R vehicle and YM 58483 is shown.

**Supplemental Table 1a.** Antibodies utilized for flow cytometry for rat studies

| Name                               | Catalog    | Clone    | Source        |
|------------------------------------|------------|----------|---------------|
| Mouse anti-rat CD4 PE-Cy5          | 554839     | OX-35    | BD Pharmingen |
| Mouse anti-rat CD8 Alexa fluor 647 | 561611     | OX-8     | BD Pharmingen |
| IL-17A monoclonal antibody FITC    | 11-7177-80 | ebio17b7 | ebiosciences  |
| Mouse anti-rat IFN- $\gamma$ FITC  | 559498     | DB-1     | BD Pharmingen |
| PE mouse anti-rat IL-4             | 555082     | OX-81    | BD Pharmingen |
| FITC Mouse Anti-Rat RT1B           | 554928     | OX-6     | BD Pharmingen |
| FITC Mouse Anti-Rat CD11b/c        | 554862     | OX-42    | BD Pharmingen |
| Anti-Orai-1                        | ACC-062    | Peptide  | Alomone Lab   |
| Anti-rat CD44APC                   | FAB6577A   | 740017   | RnD Biosystem |
| Anti-Orai-2                        | ACC-061    | Peptide  | Alomone Lab   |
| Anti-Orai-3                        | ACC-065    | Peptide  | Alomone Lab   |
| Anti-RoRyc                         | 562607     | Q31-378  | BD Pharmingen |

**Supplemental Table 1b.** Antibodies utilized for flow cytometry for Human studies

| Name           | Catalog | Clone   | Source       |
|----------------|---------|---------|--------------|
| Anti-IL-17 PE  | 512306  | BL168   | Biolegend    |
| Anti-CD4 PerCp | 317432  | OKT4    | Biolegend    |
| FITC Orai-1    | ACC-060 | Peptide | Alomone Labs |

**Supplemental Table 2:** Number and percent of Orai1 expression in different leukocyte populations in kidney following sham and I/R injury. \*indicates  $P < 0.05$  I/R vs sham by Student's t-test.

|         | % Orai1+ cells  |                  |
|---------|-----------------|------------------|
|         | Sham            | I/R              |
| CD4     | 27.1 $\pm$ 9.8  | 77.9 $\pm$ 15.3* |
| CD8     | 0.85 $\pm$ 0.01 | 0.59 $\pm$ 0.02  |
| B cells | 0.98 $\pm$ 0.48 | 1.47 $\pm$ 0.35  |
| CD11b/c | 3.2 $\pm$ 0.7   | 5.5 $\pm$ 0.65   |
